# Supplementary material for: Hydrogen-bond-directing effect in the ionothermal synthesis of metal coordination polymers
Source: Royal Society of Chemistry journal article supplement (doi:10.1039/b802892c), 2008-01-01

# Hydrogen Bond Directing Effect in the Ionothermal Synthesis of Metal Coordination Polymers

*Zhuojia Lin\**, Alexandra M. Z. Slawin and Russell E. Morris

EaStChem School of Chemistry, University of St Andrews, Purdie Building, St Andrews KY16 9ST

E-mail: [zl10@st-andrews.ac.uk](mailto:zl10@st-andrews.ac.uk)

## 1. Powder XRD patterns of compound 1 and 2.

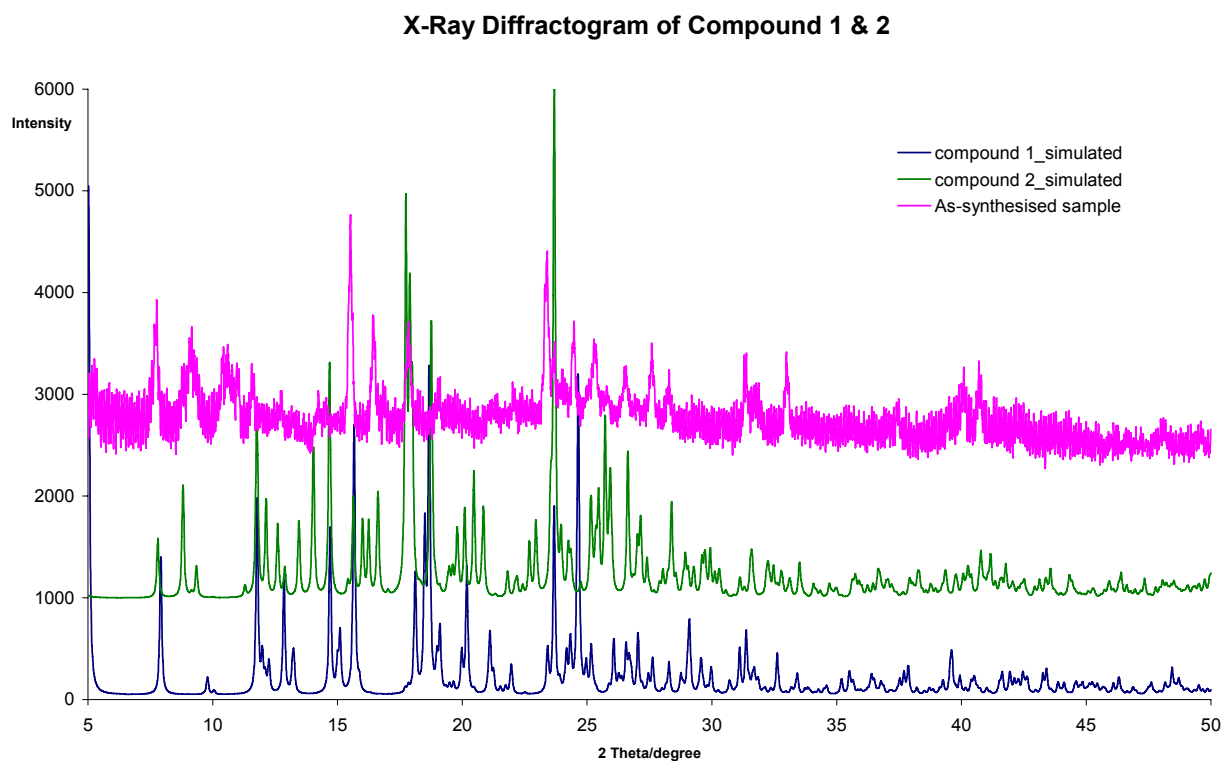

2. Powder XRD patterns of compound 3.

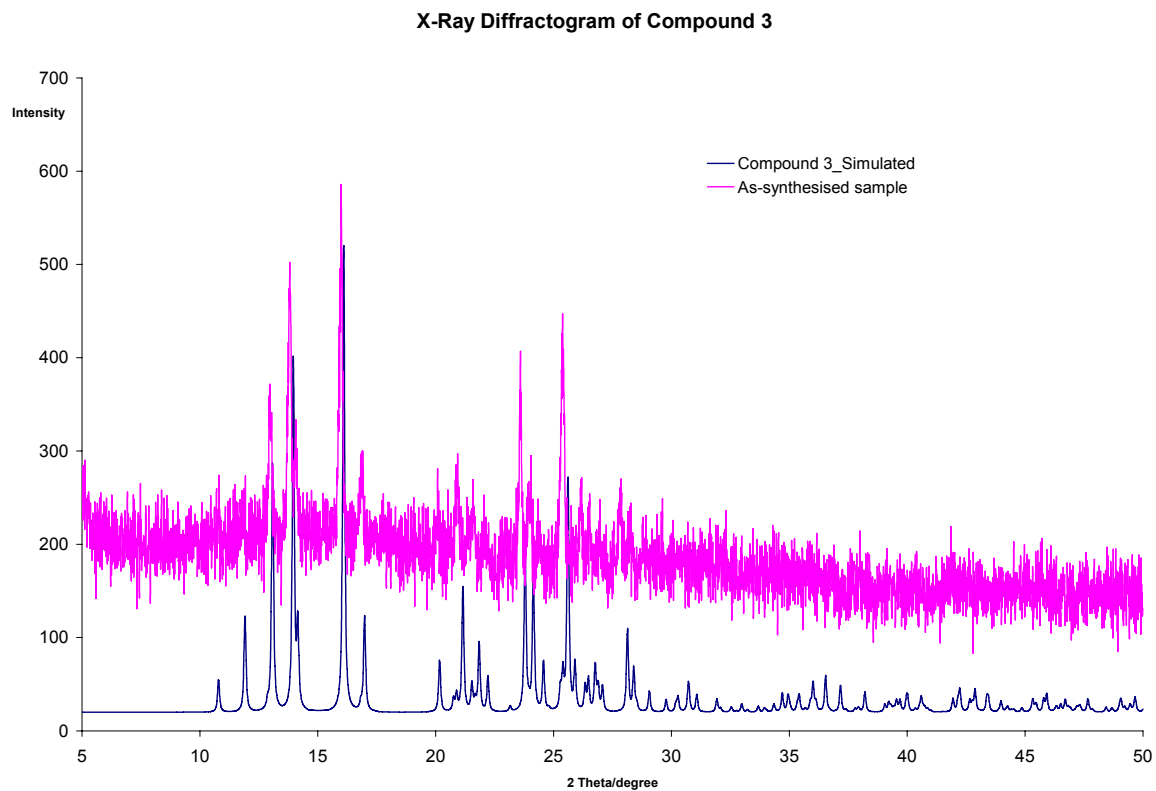

3. Powder XRD patterns of compound 4.

**X-Ray Diffractogram of Compound 4**

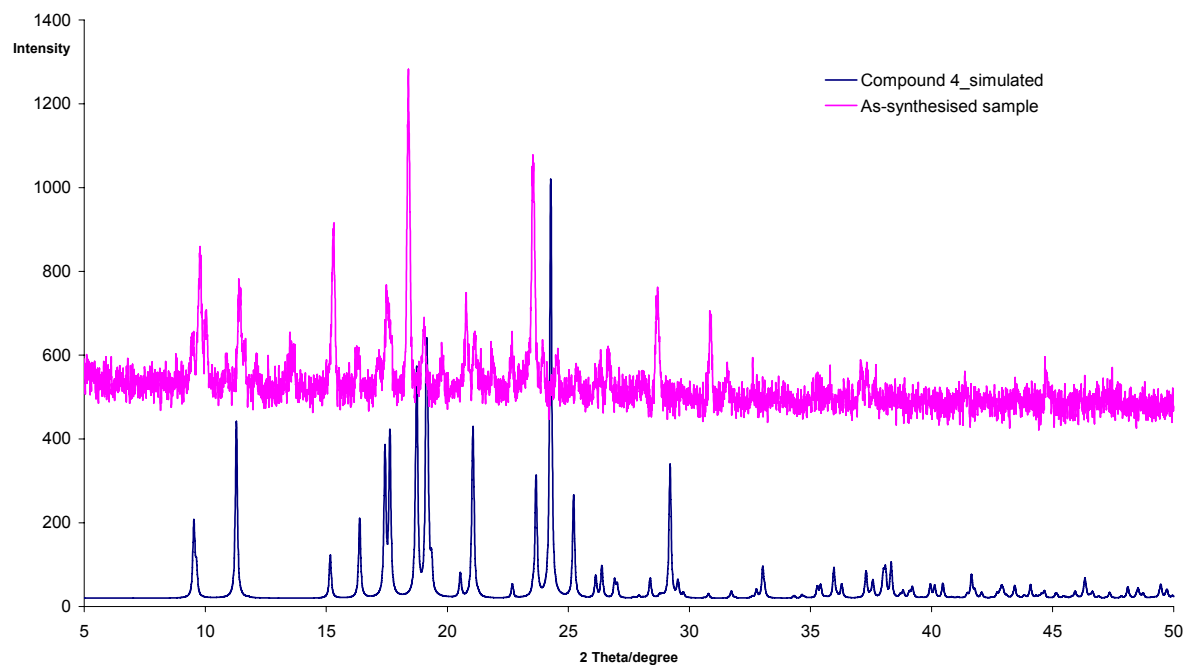

4. IR spectrum of compound 3.

**IR spectrum of compound 3**

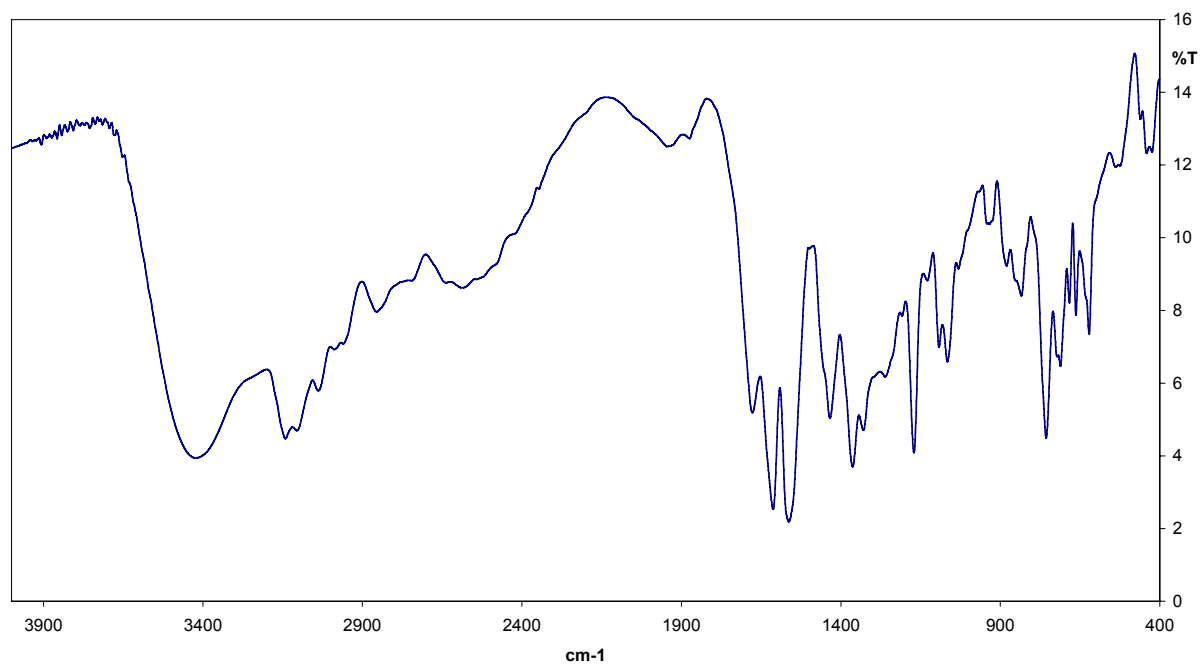

5. IR spectrum of compound 4.

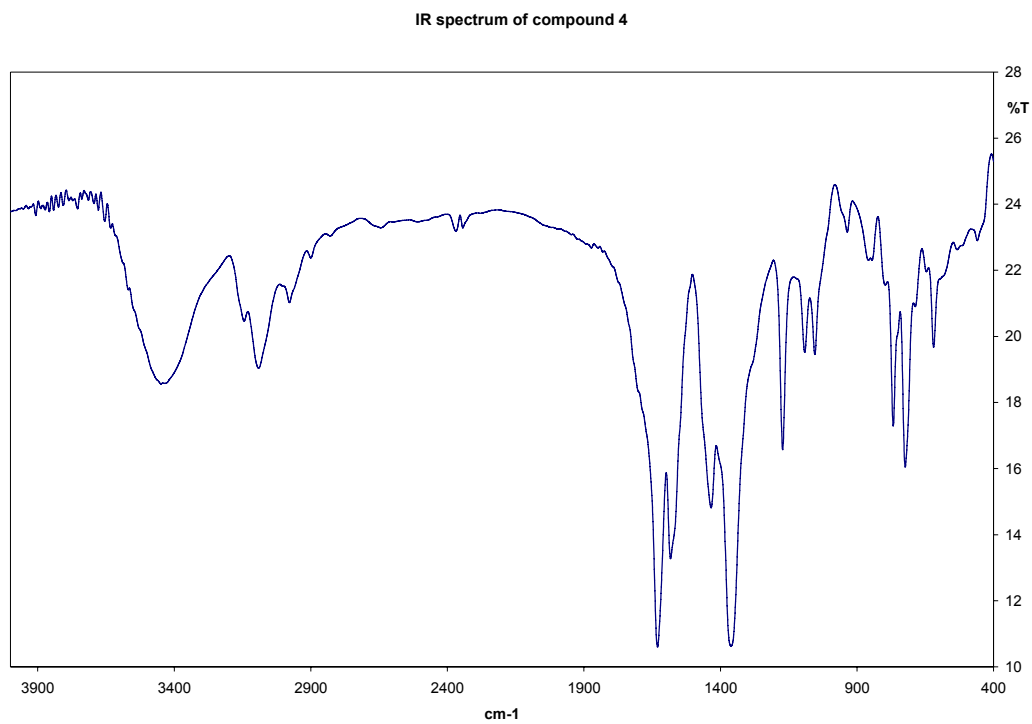

Supplement: b802892c.pdf [file b802892c.pdf]
